# Supplementary material for: Weighing the Effects of Vertical Integration Versus Market Concentration on Hospital Quality
Source: PubMed Central journal article supplement — Med Care Res Rev. 2019 Feb 9;77(6):538–48. doi: 10.1177/1077558719828938 (PMC7536528; doi:10.1177/1077558719828938), 2019-02-09
Supplement: PHIAHA_MCRR_Supplement1_181025.pdf [file PHIAHA_MCRR_Supplement1_181025.pdf]

**Supplemental Digital Content 1.** Tables containing descriptive statistics for all quality measures by year, level of integration, and market competition

**sTable 1: Summary Statistics of Quality Measures by Year**

**sTable 2. Mean Process of Care Adherence by Integration and Market Competition**

**sTable 3. Mean Readmission Rates by Integration and Market Competition**

**sTable 4. Mean Patient Satisfaction Scores by Integration and Market Competition**

**sTable 1: Summary Statistics of Quality Measures by Year**

|                                                                                 | All integration levels and years |           |       |       | First year of sample |           |        |        | Last year of sample |           |        |        |
|---------------------------------------------------------------------------------|----------------------------------|-----------|-------|-------|----------------------|-----------|--------|--------|---------------------|-----------|--------|--------|
|                                                                                 | Mean                             | Std. Dev. | Min   | Max   | Mean                 | Std. Dev. | Min    | Max    | Mean                | Std. Dev. | Min    | Max    |
| <b>Patient Satisfaction</b>                                                     |                                  |           |       |       | <b>2008</b>          |           |        |        | <b>2015</b>         |           |        |        |
| Hospital Clean                                                                  | 0.9078                           | 0.0410    | 0.66  | 1     | 0.8954               | 0.0451    | 0.70   | 1      | 0.9136              | 0.0375    | 0.74   | 1      |
| Nurse Communicated Well                                                         | 0.9500                           | 0.0272    | 0.68  | 1     | 0.9414               | 0.0304    | 0.77   | 1      | 0.9566              | 0.0226    | 0.79   | 1      |
| Doctor Communicated Well                                                        | 0.9556                           | 0.0212    | 0.75  | 1     | 0.9519               | 0.0224    | 0.83   | 1      | 0.9581              | 0.0197    | 0.85   | 1      |
| Patient Received Help as Soon as Wanted                                         | 0.8964                           | 0.0505    | 0.54  | 1     | 0.8787               | 0.0568    | 0.60   | 1      | 0.9080              | 0.0430    | 0.66   | 1      |
| Pain Well Controlled                                                            | 0.9295                           | 0.0286    | 0.67  | 1     | 0.9231               | 0.0309    | 0.74   | 1      | 0.9338              | 0.0259    | 0.75   | 1      |
| Staff Explained Medicines                                                       | 0.7964                           | 0.0524    | 0.51  | 1     | 0.7699               | 0.0585    | 0.53   | 1      | 0.8184              | 0.0444    | 0.64   | 0.9700 |
| Hospital Quiet at Night                                                         | 0.8865                           | 0.0550    | 0.64  | 1     | 0.8621               | 0.0580    | 0.64   | 1      | 0.9021              | 0.0493    | 0.68   | 1      |
| Staff Provided Home Care Instructions Probably/Definitely Recommend Hospital    | 0.8333                           | 0.0487    | 0.55  | 1     | 0.7992               | 0.0518    | 0.61   | 1      | 0.8671              | 0.0346    | 0.61   | 0.9600 |
| Hospital Rating 7-10                                                            | 0.9484                           | 0.0305    | 0.57  | 1     | 0.9429               | 0.0332    | 0.74   | 1      | 0.9510              | 0.0280    | 0.74   | 1      |
|                                                                                 | 0.9133                           | 0.0409    | 0.54  | 1     | 0.8967               | 0.0469    | 0.63   | 1      | 0.9231              | 0.0348    | 0.67   | 1      |
| <b>Readmissions</b>                                                             |                                  |           |       |       | <b>2009</b>          |           |        |        | <b>2015</b>         |           |        |        |
| Heart attack                                                                    | 0.1895                           | 0.0170    | 0.133 | 0.274 | 0.1990               | 0.0134    | 0.1530 | 0.2520 | 0.1697              | 0.0108    | 0.1330 | 0.2080 |
| Heart failure                                                                   | 0.2377                           | 0.0214    | 0.158 | 0.344 | 0.2449               | 0.0207    | 0.1590 | 0.3440 | 0.2195              | 0.0157    | 0.1580 | 0.3170 |
| Pneumonia                                                                       | 0.1787                           | 0.0157    | 0.13  | 0.276 | 0.1815               | 0.0168    | 0.1310 | 0.2760 | 0.1692              | 0.0111    | 0.1320 | 0.2160 |
| <b>Process of Care</b>                                                          |                                  |           |       |       | <b>2008</b>          |           |        |        | <b>2014</b>         |           |        |        |
| <u>AMI patients:</u>                                                            |                                  |           |       |       |                      |           |        |        |                     |           |        |        |
| Given Aspirin at Discharge                                                      | 0.9808                           | 0.0342    | 0.43  | 1     | 0.9634               | 0.0487    | 0.43   | 1      | 0.9895              | 0.0242    | 0.71   | 1      |
| Given PCI Within 90 Minutes Of Arrival                                          | 0.8953                           | 0.1217    | 0.16  | 1     | 0.7359               | 0.1620    | 0.16   | 1      | 0.9546              | 0.0675    | 0.24   | 1      |
| <u>Heart failure patients:</u>                                                  |                                  |           |       |       |                      |           |        |        |                     |           |        |        |
| Given Discharge Instructions                                                    | 0.8706                           | 0.1519    | 0     | 1     | 0.7548               | 0.1983    | 0      | 1      | 0.9369              | 0.1040    | 0      | 1      |
| Given an Evaluation of Left Ventricular Systolic Function                       | 0.9550                           | 0.0980    | 0     | 1     | 0.9074               | 0.1341    | 0      | 1      | 0.9714              | 0.0888    | 0.08   | 1      |
| Given ACE Inhibitor or ARB for Left Ventricular Systolic Dysfunction            | 0.9432                           | 0.0707    | 0.35  | 1     | 0.8983               | 0.0850    | 0.35   | 1      | 0.9657              | 0.0639    | 0.36   | 1      |
| <u>Pneumonia patients:</u>                                                      |                                  |           |       |       |                      |           |        |        |                     |           |        |        |
| Initial ER Blood Culture Performed Prior To First Hospital Dose Of Antibiotics* | 0.9483                           | 0.0539    | 0.38  | 1     | 0.9103               | 0.0643    | 0.45   | 1      | 0.9728              | 0.0337    | 0.62   | 1      |
| Given Most Appropriate Initial Antibiotic(s)                                    | 0.9200                           | 0.0743    | 0.02  | 1     | 0.8873               | 0.0731    | 0.35   | 1      | 0.9451              | 0.0816    | 0.21   | 1      |

\*First year is 2013

**sTable 1: Summary Statistics of Quality Measures by Year (continued)**

|                                                                                                           | All integration levels and years |           |      |     | First year of sample |           |      |     | Last year of sample |           |      |     |
|-----------------------------------------------------------------------------------------------------------|----------------------------------|-----------|------|-----|----------------------|-----------|------|-----|---------------------|-----------|------|-----|
|                                                                                                           | Mean                             | Std. Dev. | Min  | Max | Mean                 | Std. Dev. | Min  | Max | Mean                | Std. Dev. | Min  | Max |
| <b>Process of Care (cont.)</b>                                                                            |                                  |           |      |     | <b>2008</b>          |           |      |     | <b>2014</b>         |           |      |     |
| <u>Surgical patients:</u>                                                                                 |                                  |           |      |     |                      |           |      |     |                     |           |      |     |
| Received Preventative Antibiotics One Hour Before Incision                                                | 0.9529                           | 0.0762    | 0.14 | 1   | 0.8550               | 0.1364    | 0.14 | 1   | 0.9797              | 0.0464    | 0.33 | 1   |
| Received the Appropriate Preventative Antibiotic(s) for Their Surgery                                     | 0.9676                           | 0.0511    | 0    | 1   | 0.9233               | 0.0902    | 0.26 | 1   | 0.9840              | 0.0274    | 0.75 | 1   |
| Preventative Antibiotic(s) are Stopped Within 24 hours After Surgery                                      | 0.9353                           | 0.0927    | 0.03 | 1   | 0.8193               | 0.1532    | 0.07 | 1   | 0.9740              | 0.0479    | 0.22 | 1   |
| Doctors Ordered Treatments to Prevent Blood Clots For Certain Surgeries*                                  | 0.9212                           | 0.1137    | 0    | 1   | 0.8069               | 0.1665    | 0    | 1   | 0.9722              | 0.0514    | 0.06 | 1   |
| Received Treatment To Prevent Blood Clots Within 24 Hours Before or After Selected to Prevent Blood Clots | 0.9204                           | 0.1122    | 0    | 1   | 0.7793               | 0.1704    | 0    | 1   | 0.9768              | 0.0539    | 0.12 | 1   |
|                                                                                                           |                                  |           |      |     | <b>2010</b>          |           |      |     | <b>2014</b>         |           |      |     |
| Taking beta blockers before coming to the hospital were kept on beta before and after surgery             | 0.9460                           | 0.0748    | 0    | 1   | 0.9114               | 0.0947    | 0.11 | 1   | 0.9652              | 0.0589    | 0.27 | 1   |
| <u>Outpatients:</u>                                                                                       |                                  |           |      |     |                      |           |      |     |                     |           |      |     |
| Chest pain or possible heart attack treated with aspirin within 24 hours of arrival                       | 0.9615                           | 0.0480    | 0.46 | 1   | 0.9506               | 0.0530    | 0.46 | 1   | 0.9665              | 0.0503    | 0.63 | 1   |
| Having surgery and got antibiotic at the right time within 1 hour before surgery                          | 0.9452                           | 0.0734    | 0.03 | 1   | 0.9032               | 0.0947    | 0.03 | 1   | 0.9699              | 0.0529    | 0.10 | 1   |
| Having surgery and got the right kind of antibiotic                                                       | 0.9540                           | 0.0605    | 0    | 1   | 0.9325               | 0.0739    | 0.23 | 1   | 0.9732              | 0.0464    | 0    | 1   |

\*First year is 2013

**sTable 2: Mean Processes of Care Adherence by Integration and Market Competition**

|                                | <b>Surgical Patients</b>                                                            |                                                                                                  |                                                                                  |                                                                         |                                                                                                           |                                                                                               |
|--------------------------------|-------------------------------------------------------------------------------------|--------------------------------------------------------------------------------------------------|----------------------------------------------------------------------------------|-------------------------------------------------------------------------|-----------------------------------------------------------------------------------------------------------|-----------------------------------------------------------------------------------------------|
|                                | Received Preventative Antibiotics One Hour Before Incision                          | Received the Appropriate Preventative Antibiotic(s) for Their Surgery                            | Preventative Antibiotic(s) are Stopped Within 24 hours After Surgery             | Doctors Ordered Treatments to Prevent Blood Clots For Certain Surgeries | Received Treatment To Prevent Blood Clots Within 24 Hours Before or After Selected to Prevent Blood Clots | Taking beta blockers before coming to the hospital were kept on beta before and after surgery |
| <u>Integration level:</u>      |                                                                                     |                                                                                                  |                                                                                  |                                                                         |                                                                                                           |                                                                                               |
| No Integration                 | 95.04%                                                                              | 96.52%                                                                                           | 93.02%                                                                           | 91.18%                                                                  | 91.18%                                                                                                    | 94.11%                                                                                        |
| Independent Physician Assoc.   | 93.99%                                                                              | 96.07%                                                                                           | 91.59%                                                                           | 89.59%                                                                  | 89.53%                                                                                                    | 92.07%                                                                                        |
| Open Physician Hospital Org.   | 95.49%                                                                              | 97.07%                                                                                           | 92.95%                                                                           | 91.22%                                                                  | 91.03%                                                                                                    | 94.78%                                                                                        |
| Closed Physician Hospital Org. | 94.67%                                                                              | 96.53%                                                                                           | 92.48%                                                                           | 91.93%                                                                  | 91.17%                                                                                                    | 95.14%                                                                                        |
| Fully Integrated Org.          | 95.61%                                                                              | 96.96%                                                                                           | 94.28%                                                                           | 93.17%                                                                  | 93.08%                                                                                                    | 95.02%                                                                                        |
| <u>Market Concentration</u>    |                                                                                     |                                                                                                  |                                                                                  |                                                                         |                                                                                                           |                                                                                               |
| Quartile 1 (low HHI)           | 95.50%                                                                              | 96.78%                                                                                           | 93.44%                                                                           | 92.04%                                                                  | 92.26%                                                                                                    | 94.78%                                                                                        |
| Quartile 2                     | 95.32%                                                                              | 96.84%                                                                                           | 93.44%                                                                           | 92.00%                                                                  | 91.71%                                                                                                    | 94.63%                                                                                        |
| Quartile 3                     | 95.21%                                                                              | 96.74%                                                                                           | 93.45%                                                                           | 92.18%                                                                  | 92.03%                                                                                                    | 94.23%                                                                                        |
| Quartile 4 (high HHI)          | 95.14%                                                                              | 96.67%                                                                                           | 93.79%                                                                           | 92.26%                                                                  | 92.14%                                                                                                    | 94.77%                                                                                        |
|                                | <b>Outpatients</b>                                                                  |                                                                                                  |                                                                                  |                                                                         |                                                                                                           |                                                                                               |
|                                | Chest pain or possible heart attack treated with aspirin within 24 hours of arrival | Average number of minutes before outpatients with chest pain or possible heart attack got an ECG | Having surgery and got antibiotic at the right time within 1 hour before surgery | Having surgery and got the right kind of antibiotic                     |                                                                                                           |                                                                                               |
| <u>Integration level:</u>      |                                                                                     |                                                                                                  |                                                                                  |                                                                         |                                                                                                           |                                                                                               |
| No Integration                 | 95.85%                                                                              | 9.03                                                                                             | 94.31%                                                                           | 95.30%                                                                  |                                                                                                           |                                                                                               |
| Independent Physician Assoc.   | 95.68%                                                                              | 8.93                                                                                             | 93.34%                                                                           | 94.23%                                                                  |                                                                                                           |                                                                                               |
| Open Physician Hospital Org.   | 96.02%                                                                              | 8.03                                                                                             | 94.37%                                                                           | 95.00%                                                                  |                                                                                                           |                                                                                               |
| Closed Physician Hospital Org. | 95.57%                                                                              | 8.29                                                                                             | 94.29%                                                                           | 95.18%                                                                  |                                                                                                           |                                                                                               |
| Fully Integrated Org.          | 96.49%                                                                              | 8.27                                                                                             | 94.74%                                                                           | 95.61%                                                                  |                                                                                                           |                                                                                               |
| <u>Market Concentration</u>    |                                                                                     |                                                                                                  |                                                                                  |                                                                         |                                                                                                           |                                                                                               |
| Quartile 1 (low HHI)           | 96.16%                                                                              | 8.14                                                                                             | 94.74%                                                                           | 95.46%                                                                  |                                                                                                           |                                                                                               |
| Quartile 2                     | 96.34%                                                                              | 7.90                                                                                             | 94.43%                                                                           | 95.47%                                                                  |                                                                                                           |                                                                                               |
| Quartile 3                     | 96.00%                                                                              | 9.52                                                                                             | 94.40%                                                                           | 95.35%                                                                  |                                                                                                           |                                                                                               |
| Quartile 4 (high HHI)          | 96.11%                                                                              | 9.00                                                                                             | 94.50%                                                                           | 95.32%                                                                  |                                                                                                           |                                                                                               |

**sTable 2: Mean Processes of Care Adherence by Integration and Market Competition (continued)**

|                                | Heart attack (AMI) patients |                                        | Heart Failure Patients       |                                                           |                                                                      | Pneumonia patients                                                                             |                                              |
|--------------------------------|-----------------------------|----------------------------------------|------------------------------|-----------------------------------------------------------|----------------------------------------------------------------------|------------------------------------------------------------------------------------------------|----------------------------------------------|
|                                | Given Aspirin at Discharge  | Given PCI Within 90 Minutes Of Arrival | Given Discharge Instructions | Given an Evaluation of Left Ventricular Systolic Function | Given ACE Inhibitor or ARB for Left Ventricular Systolic Dysfunction | Initial Emergency Room Blood Culture Performed Prior To The First Hospital Dose Of Antibiotics | Given Most Appropriate Initial Antibiotic(s) |
| <u>Integration level:</u>      |                             |                                        |                              |                                                           |                                                                      |                                                                                                |                                              |
| No Integration                 | 97.82%                      | 88.85%                                 | 86.25%                       | 94.34%                                                    | 93.75%                                                               | 94.65%                                                                                         | 91.24%                                       |
| Independent Physician Assoc.   | 97.10%                      | 88.61%                                 | 83.46%                       | 93.54%                                                    | 93.48%                                                               | 94.37%                                                                                         | 90.40%                                       |
| Open Physician Hospital Org.   | 97.56%                      | 88.43%                                 | 85.94%                       | 96.16%                                                    | 93.65%                                                               | 94.73%                                                                                         | 91.82%                                       |
| Closed Physician Hospital Org. | 98.02%                      | 89.49%                                 | 87.04%                       | 96.35%                                                    | 94.00%                                                               | 94.72%                                                                                         | 92.02%                                       |
| Fully Integrated Org.          | 98.35%                      | 89.92%                                 | 87.97%                       | 96.19%                                                    | 94.81%                                                               | 95.02%                                                                                         | 92.64%                                       |
| <u>Market Concentration</u>    |                             |                                        |                              |                                                           |                                                                      |                                                                                                |                                              |
| Quartile 1 (low HHI)           | 98.04%                      | 89.21%                                 | 87.07%                       | 96.10%                                                    | 94.63%                                                               | 95.01%                                                                                         | 92.37%                                       |
| Quartile 2                     | 98.33%                      | 90.05%                                 | 87.57%                       | 95.78%                                                    | 94.69%                                                               | 94.93%                                                                                         | 92.10%                                       |
| Quartile 3                     | 97.95%                      | 89.81%                                 | 86.59%                       | 95.04%                                                    | 94.05%                                                               | 94.71%                                                                                         | 91.64%                                       |
| Quartile 4 (high HHI)          | 98.01%                      | 89.07%                                 | 87.00%                       | 95.06%                                                    | 93.91%                                                               | 94.66%                                                                                         | 91.89%                                       |

**sTable 3: Mean Readmission Rates by Integration and Market Competition**

|                                | AMI    | Heart Failure | Pneumonia |
|--------------------------------|--------|---------------|-----------|
| <u>Integration level:</u>      |        |               |           |
| No Integration                 | 19.10% | 23.97%        | 17.92%    |
| Independent Physician Assoc.   | 19.15% | 23.93%        | 17.84%    |
| Open Physician Hospital Org.   | 19.00% | 23.90%        | 17.98%    |
| Closed Physician Hospital Org. | 19.28% | 24.10%        | 18.06%    |
| Fully Integrated Org.          | 18.82% | 23.58%        | 17.80%    |
| <u>Market Concentration</u>    |        |               |           |
| Quartile 1 (low HHI)           | 19.30% | 24.24%        | 18.15%    |
| Quartile 2                     | 18.88% | 23.73%        | 17.87%    |
| Quartile 3                     | 18.94% | 23.70%        | 17.81%    |
| Quartile 4 (high HHI)          | 18.69% | 23.43%        | 17.66%    |

**sTable 4: Mean Patient Satisfaction Scores by Integration and Market Competition**

|                                     | Hospital Clean | Nurse Communicated Well | Doctor Communicated Well | Patient Received Help as Soon as Wanted | Pain Well Controlled | Staff Explained Medicines | Hospital Quiet at Night | Staff Provided Home Care Instructions | Probably/ Definitely Recommend Hospital | Hospital Rating 7-10 |
|-------------------------------------|----------------|-------------------------|--------------------------|-----------------------------------------|----------------------|---------------------------|-------------------------|---------------------------------------|-----------------------------------------|----------------------|
| <u>Integration level:</u>           |                |                         |                          |                                         |                      |                           |                         |                                       |                                         |                      |
| No Integration Independent          | 90.60%         | 94.71%                  | 95.57%                   | 89.51%                                  | 92.71%               | 79.56%                    | 89.03%                  | 82.97%                                | 94.40%                                  | 91.04%               |
| Physician Assoc. Open Physician     | 90.83%         | 94.55%                  | 95.28%                   | 88.98%                                  | 92.63%               | 78.95%                    | 88.32%                  | 82.38%                                | 94.48%                                  | 90.92%               |
| Hospital Org. Closed Physician      | 90.85%         | 95.06%                  | 95.59%                   | 89.63%                                  | 92.99%               | 79.41%                    | 89.24%                  | 82.93%                                | 94.82%                                  | 91.20%               |
| Hospital Org. Fully Integrated Org. | 90.30%         | 94.52%                  | 95.27%                   | 88.69%                                  | 92.62%               | 78.73%                    | 88.08%                  | 82.61%                                | 94.44%                                  | 90.64%               |
| Fully Integrated Org.               | 90.93%         | 95.27%                  | 95.61%                   | 89.89%                                  | 93.16%               | 79.89%                    | 88.43%                  | 83.78%                                | 95.20%                                  | 91.64%               |
| <u>Market Concentration</u>         |                |                         |                          |                                         |                      |                           |                         |                                       |                                         |                      |
| Quartile 1 (low HHI)                | 90.02%         | 94.33%                  | 95.19%                   | 90.76%                                  | 92.46%               | 78.49%                    | 87.81%                  | 82.39%                                | 94.33%                                  | 90.81%               |
| Quartile 2                          | 90.54%         | 94.87%                  | 95.46%                   | 90.10%                                  | 92.84%               | 79.46%                    | 88.50%                  | 82.42%                                | 94.70%                                  | 91.21%               |
| Quartile 3                          | 91.06%         | 95.28%                  | 95.73%                   | 89.36%                                  | 93.13%               | 80.07%                    | 88.89%                  | 83.46%                                | 95.04%                                  | 91.47%               |
| Quartile 4 (high HHI)               | 91.48%         | 95.52%                  | 95.87%                   | 89.34%                                  | 93.39%               | 80.54%                    | 89.39%                  | 84.07%                                | 95.30%                                  | 91.82%               |
