# Supplementary material for: Weighing the Effects of Vertical Integration Versus Market Concentration on Hospital Quality
Source: PubMed Central journal article supplement — Med Care Res Rev. 2019 Feb 9;77(6):538–48. doi: 10.1177/1077558719828938 (PMC7536528; doi:10.1177/1077558719828938), 2019-02-09
Supplement: PHIAHA_MCRR_Supplement2_181218.pdf [file PHIAHA_MCRR_Supplement2_181218.pdf]

**Supplemental Digital Content 2.** Tables containing regression results of all variables

**sTable 5. Adjusted Effect on Process of Care Adherence**

**sTable 6. Adjusted Effect on Readmission Rates**

**sTable 7. Adjusted Effect on Patient Satisfaction**

**sTable 5. Adjusted Effect on Process of Care Adherence**

|                                 | Surgical Patients:                                         |                                                                       |                                                                      |                                                                         |                                                                                               |                                                                                 | Outpatients                                                                         |                                                                                  |                                                     |
|---------------------------------|------------------------------------------------------------|-----------------------------------------------------------------------|----------------------------------------------------------------------|-------------------------------------------------------------------------|-----------------------------------------------------------------------------------------------|---------------------------------------------------------------------------------|-------------------------------------------------------------------------------------|----------------------------------------------------------------------------------|-----------------------------------------------------|
|                                 | Received Preventative Antibiotics One Hour Before Incision | Received the Appropriate Preventative Antibiotic(s) for Their Surgery | Preventative Antibiotic(s) are Stopped Within 24 hours After Surgery | Doctors Ordered Treatments to Prevent Blood Clots For Certain Surgeries | Treatment To Prevent Blood Clots Within 24 Hr Before or After Selected to Prevent Blood Clots | Taking beta blockers before coming to hospital & kept on before & after surgery | Chest pain or possible heart attack treated with aspirin within 24 hours of arrival | Having surgery and got antibiotic at the right time within 1 hour before surgery | Having surgery and got the right kind of antibiotic |
| <b>Market Concentration</b>     |                                                            |                                                                       |                                                                      |                                                                         |                                                                                               |                                                                                 |                                                                                     |                                                                                  |                                                     |
| HHI                             | -6.75E-06<br>[-0.0000176, 0.00000408]                      | -4.23E-06<br>[-0.0000125, 0.00000408]                                 | -0.0000136<br>[-0.0000302, 0.00000294]                               | -5.01E-06<br>[-0.0000278, 0.0000178]                                    | -4.12E-06<br>[-0.0000246, 0.0000164]                                                          | 0.00000978*<br>[-0.0000187, 0.0000382]                                          | -2.01E-06<br>[-0.0000106, 0.0000066]                                                | 2.26E-06<br>[-0.00000689, 0.0000114]                                             | -2.75E-06<br>[-0.00000988, 0.00000439]              |
| <b>Integration level</b>        |                                                            |                                                                       |                                                                      |                                                                         |                                                                                               |                                                                                 |                                                                                     |                                                                                  |                                                     |
| Independent                     | 0.00369                                                    | 0.000878                                                              | -0.000786                                                            | -0.0296*                                                                | -0.0338*                                                                                      | -0.0496                                                                         | -0.000877                                                                           | 0.009                                                                            | -0.00281                                            |
| Physician Assoc. Open Physician | [-0.00550, 0.0129]                                         | [-0.0136, 0.0153]                                                     | [-0.0214, 0.0198]                                                    | [-0.0578, -0.00133]                                                     | [-0.0647, -0.00297]                                                                           | [-0.0993, 0.000156]                                                             | [-0.0152, 0.0134]                                                                   | [-0.00375, 0.0218]                                                               | [-0.0104, 0.00474]                                  |
| Hospital Org. Closed Physician  | 0.00114                                                    | 0.00623                                                               | 0.00606                                                              | -0.00197                                                                | -0.00103                                                                                      | 0.0204*                                                                         | 0.00808                                                                             | -0.00342                                                                         | -0.00292                                            |
| Hospital Org. Fully Integrated  | [-0.00959, 0.0119]                                         | [-0.00179, 0.0142]                                                    | [-0.00646, 0.0186]                                                   | [-0.0188, 0.0149]                                                       | [-0.0144, 0.0124]                                                                             | [0.000365, 0.0405]                                                              | [-0.00137, 0.0175]                                                                  | [-0.0129, 0.00604]                                                               | [-0.00976, 0.00392]                                 |
| Hospital Org. Fully Integrated  | -0.00663                                                   | 0.00473                                                               | 0.0000342                                                            | -0.00424                                                                | -0.00468                                                                                      | 0.0108                                                                          | 0.00937*                                                                            | 0.00872*                                                                         | 0.0011                                              |
| Hospital Org. Fully Integrated  | [-0.0190, 0.00579]                                         | [-0.00260, 0.0120]                                                    | [-0.0121, 0.0121]                                                    | [-0.02460, 0.0161]                                                      | [-0.0219, 0.0125]                                                                             | [-0.00649, 0.0280]                                                              | [0.00119, 0.0175]                                                                   | [0.00165, 0.0158]                                                                | [-0.00524, 0.00744]                                 |
| Hospital Org. Fully Integrated  | -0.00126                                                   | 0.000619                                                              | 0.00653                                                              | 0.00645                                                                 | 0.00375                                                                                       | 0.0138**†                                                                       | 0.00528*                                                                            | 0.00341                                                                          | -0.00284                                            |
| Hospital Org. Fully Integrated  | [-0.00705, 0.00454]                                        | [-0.00409, 0.00533]                                                   | [-0.00170, 0.0148]                                                   | [-0.00414, 0.0170]                                                      | [-0.00486, 0.0123]                                                                            | [0.00415, 0.0234]                                                               | [0.000372, 0.0102]                                                                  | [-0.00220, 0.00903]                                                              | [-0.00730, 0.00162]                                 |
| <b>Admissions</b>               |                                                            |                                                                       |                                                                      |                                                                         |                                                                                               |                                                                                 |                                                                                     |                                                                                  |                                                     |
| Quartile 2                      | 0.00134                                                    | 0.00303                                                               | 0.00406                                                              | -0.00257                                                                | -0.000668                                                                                     | 0.00349                                                                         | -0.00115                                                                            | 0.00102                                                                          | -0.000411                                           |
| Quartile 2                      | [-0.00697, 0.00965]                                        | [-0.00230, 0.00837]                                                   | [-0.00446, 0.0126]                                                   | [-0.0151, 0.00992]                                                      | [-0.0101, 0.00880]                                                                            | [-0.00978, 0.0168]                                                              | [-0.00907, 0.00677]                                                                 | [-0.00658, 0.00862]                                                              | [-0.00785, 0.00702]                                 |
| Quartile 3                      | 0.000201                                                   | 0.00136                                                               | 0.00286                                                              | -0.00221                                                                | -0.00376                                                                                      | 0.00297                                                                         | 0.00342                                                                             | 0.00079                                                                          | 0.00235                                             |
| Quartile 3                      | [-0.0114, 0.0118]                                          | [-0.00705, 0.00978]                                                   | [-0.00921, 0.0149]                                                   | [-0.0190, 0.0146]                                                       | [-0.0168, 0.00934]                                                                            | [-0.0168, 0.0227]                                                               | [-0.00678, 0.0136]                                                                  | [-0.00871, 0.0103]                                                               | [-0.00635, 0.0110]                                  |
| Quartile 4                      | -0.0104                                                    | -0.0029                                                               | 0.000985                                                             | -0.00338                                                                | -0.014                                                                                        | -0.00364                                                                        | 0.00715                                                                             | -0.00374                                                                         | 0.00314                                             |
| Quartile 4                      | [-0.0258, 0.00510]                                         | [-0.0138, 0.00804]                                                    | [-0.0146, 0.0165]                                                    | [-0.0245, 0.0177]                                                       | [-0.0320, 0.00393]                                                                            | [-0.0289, 0.0216]                                                               | [-0.00493, 0.0192]                                                                  | [-0.0150, 0.00757]                                                               | [-0.00709, 0.0134]                                  |
| <b>Nurse-to-patient ratio</b>   | 0.000305                                                   | 0.000679                                                              | -0.00150**†                                                          | 0.0000418                                                               | 0.000513                                                                                      | 0.00638                                                                         | -0.000491                                                                           | -0.00131                                                                         | -0.00135                                            |
| <b>Nurse-to-patient ratio</b>   | [-0.000927, 0.00154]                                       | [-0.00136, 0.00272]                                                   | [-0.00245, -0.000539]                                                | [-0.00263, 0.00271]                                                     | [-0.00151, 0.00253]                                                                           | [-0.00943, 0.0222]                                                              | [-0.00127, 0.000292]                                                                | [-0.00384, 0.00121]                                                              | [-0.00298, 0.000278]                                |
| <b>CT Scanner</b>               |                                                            |                                                                       |                                                                      |                                                                         |                                                                                               |                                                                                 |                                                                                     |                                                                                  |                                                     |
| CT Scanner                      | 0.00662                                                    | -0.00266                                                              | -0.00293                                                             | -0.0125                                                                 | -0.0132                                                                                       | 0.00702                                                                         | 0.00569                                                                             | -0.00486                                                                         | 0.00187                                             |
| CT Scanner                      | [-0.00482, 0.0180]                                         | [-0.0108, 0.00554]                                                    | [-0.0157, 0.00990]                                                   | [-0.0305, 0.00560]                                                      | [-0.0284, 0.00202]                                                                            | [-0.0196, 0.0336]                                                               | [-0.00260, 0.0140]                                                                  | [-0.0148, 0.00514]                                                               | [-0.00875, 0.0125]                                  |
| <b>EBCT†</b>                    |                                                            |                                                                       |                                                                      |                                                                         |                                                                                               |                                                                                 |                                                                                     |                                                                                  |                                                     |
| EBCT†                           | 0.00394                                                    | 0.00353                                                               | 0.00249                                                              | -0.0126                                                                 | -0.00714                                                                                      | 0.00154                                                                         | 0.00643                                                                             | 0.000997                                                                         | -0.000115                                           |
| EBCT†                           | [-0.00533, 0.0132]                                         | [-0.00141, 0.00848]                                                   | [-0.00628, 0.0113]                                                   | [-0.0277, 0.00260]                                                      | [-0.0189, 0.00460]                                                                            | [-0.0102, 0.0133]                                                               | [-0.00166, 0.0145]                                                                  | [-0.00422, 0.00621]                                                              | [-0.00469, 0.00446]                                 |
| <b>MRI†</b>                     |                                                            |                                                                       |                                                                      |                                                                         |                                                                                               |                                                                                 |                                                                                     |                                                                                  |                                                     |
| MRI†                            | -0.00849                                                   | -0.00244                                                              | -0.000855                                                            | 0.00634                                                                 | 0.00532                                                                                       | -0.00748                                                                        | -0.00516                                                                            | 0.00285                                                                          | 0.00149                                             |
| MRI†                            | [-0.0180, 0.000966]                                        | [-0.00952, 0.00464]                                                   | [-0.0116, 0.00992]                                                   | [-0.00907, 0.0218]                                                      | [-0.00806, 0.0187]                                                                            | [-0.0280, 0.0131]                                                               | [-0.0112, 0.000865]                                                                 | [-0.00590, 0.0116]                                                               | [-0.00618, 0.00916]                                 |
| <b>MSCT†</b>                    |                                                            |                                                                       |                                                                      |                                                                         |                                                                                               |                                                                                 |                                                                                     |                                                                                  |                                                     |
| MSCT†                           | -0.000878                                                  | 0.00163                                                               | -0.00102                                                             | -0.00033                                                                | 0.00198                                                                                       | 0.000284                                                                        | -0.000218                                                                           | 0.00047                                                                          | -0.000729                                           |
| MSCT†                           | [-0.00615, 0.00439]                                        | [-0.00239, 0.00566]                                                   | [-0.00726, 0.00522]                                                  | [-0.00806, 0.00740]                                                     | [-0.00478, 0.00875]                                                                           | [-0.00890, 0.00947]                                                             | [-0.00424, 0.00381]                                                                 | [-0.00466, 0.00560]                                                              | [-0.00472, 0.00326]                                 |
| <b>PET†</b>                     |                                                            |                                                                       |                                                                      |                                                                         |                                                                                               |                                                                                 |                                                                                     |                                                                                  |                                                     |
| PET†                            | 0.00347                                                    | -0.00000345                                                           | -0.00282                                                             | -0.00683                                                                | -0.00519                                                                                      | 0.000716                                                                        | -0.00243                                                                            | 0.00128                                                                          | 0.000685                                            |
| PET†                            | [-0.00268, 0.00962]                                        | [-0.00427, 0.00426]                                                   | [-0.00959, 0.00394]                                                  | [-0.0172, 0.00358]                                                      | [-0.0136, 0.00327]                                                                            | [-0.00947, 0.0109]                                                              | [-0.00864, 0.00377]                                                                 | [-0.00324, 0.00582]                                                              | [-0.00286, 0.00423]                                 |

Year and hospital fixed effects also included in regression

95% CI in brackets; \*\*\* p<0.001, \*\* p<0.01, \* p<0.05; † Bonferroni Correction statistically significant

‡Electron beam computed tomography (EBCT), magnetic resonance imaging (MRI), multi-slice spiral computed tomography (MSCT), positron emission tomography (PET)

**sTable 5. Adjusted Effect on Process of Care Adherence (cont.)**

|                                | Heart Attack (AMI) Patients:          |                                        | Heart Failure Patients:              |                                                           |                                                                      | Pneumonia Patients:                                                                        |                                              |
|--------------------------------|---------------------------------------|----------------------------------------|--------------------------------------|-----------------------------------------------------------|----------------------------------------------------------------------|--------------------------------------------------------------------------------------------|----------------------------------------------|
|                                | Given Aspirin at Discharge            | Given PCI Within 90 Minutes Of Arrival | Given Discharge Instructions         | Given an Evaluation of Left Ventricular Systolic Function | Given ACE Inhibitor or ARB for Left Ventricular Systolic Dysfunction | Initial Emergency Room Blood Culture Performed Prior To First Hospital Dose Of Antibiotics | Given Most Appropriate Initial Antibiotic(s) |
| <b>Market Concentration</b>    |                                       |                                        |                                      |                                                           |                                                                      |                                                                                            |                                              |
| HHI                            | 1.86E-06<br>[-0.00000239, 0.00000611] | -0.0000105<br>[-0.0000262, 0.00000527] | -5.33E-06<br>[-0.0000213, 0.0000107] | 6.04E-07<br>[-0.00000646, 0.00000767]                     | 2.71E-06<br>[-0.00000788, 0.0000133]                                 | -3.53E-06<br>[-0.0000104, 0.00000338]                                                      | -1.56E-06<br>[-0.0000106, 0.00000749]        |
| <b>Integration level</b>       |                                       |                                        |                                      |                                                           |                                                                      |                                                                                            |                                              |
| Independent Physician Assoc.   | -0.00277<br>[-0.00869, 0.00314]       | 0.00376<br>[-0.0211, 0.0287]           | 0.000328<br>[-0.0211, 0.0218]        | -0.00485<br>[-0.0127, 0.00304]                            | -0.000922<br>[-0.0117, 0.00984]                                      | -0.00831<br>[-0.0176, 0.000974]                                                            | -0.00895<br>[-0.0194, 0.00152]               |
| Open Physician Hospital Org.   | -0.0032<br>[-0.00864, 0.00224]        | 0.00268<br>[-0.0157, 0.0210]           | -0.00494<br>[-0.0207, 0.0108]        | -0.00477<br>[-0.0128, 0.00322]                            | -0.00255<br>[-0.0125, 0.00738]                                       | -0.00623<br>[-0.0132, 0.000697]                                                            | 0.00201<br>[-0.00605, 0.0101]                |
| Closed Physician Hospital Org. | -0.00201<br>[-0.00617, 0.00216]       | 0.00731<br>[-0.0104, 0.0250]           | 0.00872<br>[-0.00430, 0.0217]        | -0.000573<br>[-0.00704, 0.00589]                          | 0.00306*<br>[-0.00583, 0.0120]                                       | -0.00102<br>[-0.00733, 0.00529]                                                            | 0.00486<br>[-0.00218, 0.0119]                |
| Fully Integrated Org.          | -0.000698<br>[-0.00327, 0.00188]      | -0.00529<br>[-0.0173, 0.00677]         | -0.000056<br>[-0.00931, 0.00920]     | -0.00295<br>[-0.00675, 0.000856]                          | 0.00158<br>[-0.00401, 0.00716]                                       | -0.0000537<br>[-0.00395, 0.00384]                                                          | -0.000507<br>[-0.00549, 0.00448]             |
| <b>Admissions</b>              |                                       |                                        |                                      |                                                           |                                                                      |                                                                                            |                                              |
| Quartile 2                     | 0.00104<br>[-0.00338, 0.00546]        | 0.00406<br>[-0.00932, 0.0174]          | 0.00381<br>[-0.0143, 0.0220]         | 0.00394<br>[-0.00156, 0.00944]                            | -0.00107<br>[-0.00859, 0.00644]                                      | 0.00229<br>[-0.00414, 0.00872]                                                             | 0.00503<br>[-0.00226, 0.0123]                |
| Quartile 3                     | 0.00329<br>[-.00176, .00835]          | 0.00327<br>[-0.0155, 0.0221]           | 0.0092<br>[-0.0127, 0.0311]          | 0.00349<br>[-0.00431, 0.0113]                             | -0.00184<br>[-0.0122, 0.00851]                                       | 0.000986<br>[-0.00783, 0.00980]                                                            | -0.00786<br>[-0.0177, 0.00194]               |
| Quartile 4                     | 0.00512<br>[-.000540, .0108]          | 0.00429<br>[-0.0184, 0.0270]           | 0.0132<br>[-0.0124, 0.0389]          | 0.00133<br>[-0.00904, 0.0117]                             | -0.00466<br>[-0.0182, 0.00893]                                       | 0.00258<br>[-0.00842, 0.0136]                                                              | -0.00694<br>[-0.0191, 0.00525]               |
| <b>Nurse-to-patient ratio</b>  | -0.000545<br>[-.00334, .00225]        | 0.00139<br>[-0.00903, 0.0118]          | -0.00215<br>[-0.00950, 0.00520]      | 0.00000407<br>[-0.00231, 0.00231]                         | -0.00202<br>[-0.00832, 0.00428]                                      | -0.00202<br>[-0.00540, 0.00135]                                                            | -0.00408***<br>[-0.00734, -0.000827]         |
| <b>CT Scanner</b>              | -0.00242<br>[-0.00831, 0.00346]       | -0.00401<br>[-0.0283, 0.0203]          | 0.0106<br>[-0.00600, 0.0272]         | 0.00307<br>[-0.00469, 0.0108]                             | 0.00436<br>[-0.00798, 0.0167]                                        | 0.00425<br>[-0.00373, 0.0122]                                                              | 0.00273<br>[-0.00600, 0.0115]                |
| <b>EBCT†</b>                   | 0.0000924<br>[-0.00323, 0.00341]      | -0.00999<br>[-0.0210, 0.00100]         | -0.0107<br>[-0.0223, 0.000988]       | -0.00114<br>[-0.00756, 0.00528]                           | -0.000741<br>[-0.00820, 0.00672]                                     | 0.00144<br>[-0.00424, 0.00712]                                                             | -0.00136<br>[-0.00785, 0.00514]              |
| <b>MRI†</b>                    | 0.00610***<br>[.00152, .0107]         | 0.0134<br>[-0.00296, 0.0297]           | 0.00293<br>[-0.0116, 0.0174]         | -0.00328<br>[-0.00827, 0.00171]                           | 0.000299<br>[-0.00771, 0.00831]                                      | -0.00387<br>[-0.00912, 0.00136]                                                            | -0.00297<br>[-0.00951, 0.00357]              |
| <b>MSCT†</b>                   | -0.00211<br>[-0.00484, 0.000616]      | -0.00237<br>[-0.0162, 0.0114]          | -0.00226<br>[-0.0102, 0.00570]       | -0.00304<br>[-0.00625, 0.000163]                          | -0.00535<br>[-0.0107, 0.000023]                                      | -0.000824<br>[-0.00397, 0.00232]                                                           | 0.000168<br>[-0.00397, 0.00430]              |
| <b>PET†</b>                    | -0.00259*<br>[-0.00493, -0.000252]    | -0.00372<br>[-0.0126, 0.00514]         | -0.00028<br>[-0.00834, 0.00778]      | 0.00177<br>[-0.00222, 0.00576]                            | -0.000856<br>[-0.00610, 0.00439]                                     | 0.000493<br>[-0.00356, 0.00455]                                                            | -0.00141<br>[-0.00588, 0.00306]              |

Year and hospital fixed effects also included in regression

95% CI in brackets; \*\*\* p<0.001, \*\* p<0.01, \* p<0.05; † Bonferroni Correction statistically significant

‡Electron beam computed tomography (EBCT), magnetic resonance imaging (MRI), multi-slicespiral computed tomography (MSCT), positron emission tomography (PET)

**sTable 6. Adjusted Effect on Readmission Rates**

|                                | Heart Attack (AMI)                     | Heart Failure                          | Pneumonia                              |
|--------------------------------|----------------------------------------|----------------------------------------|----------------------------------------|
| <b>Market Concentration</b>    |                                        |                                        |                                        |
| HHI                            | -1.41E-07<br>[-0.00000212, 0.00000183] | -3.36E-07<br>[-0.00000189, 0.00000122] | 4.76E-07<br>[-0.000000725, 0.00000168] |
| <b>Integration level</b>       |                                        |                                        |                                        |
| Independent Physician Assoc.   | 0.000717<br>[-0.00127, 0.00270]        | -0.00167<br>[-0.00382, 0.000489]       | -0.000311<br>[-0.00196, 0.00133]       |
| Open Physician Hospital Org.   | -0.000889<br>[-0.00269, 0.000909]      | 0.00115<br>[-0.000929, 0.00322]        | -0.000601<br>[-0.00222, 0.00102]       |
| Closed Physician Hospital Org. | -0.000642<br>[-0.00220, 0.000913]      | 0.00117<br>[-0.000642, 0.00298]        | -0.00191*†<br>[-0.00336, -0.000453]    |
| Fully Integrated Org.          | -0.000838<br>[-0.00182, 0.000142]      | 0.000215<br>[-0.000841, 0.00127]       | -0.00118**†<br>[-0.00203, -0.000321]   |
| <b>Admissions</b>              |                                        |                                        |                                        |
| Quartile 2                     | -0.000603<br>[-0.00183, 0.000624]      | 0.00146<br>[-0.000284, 0.00320]        | 0.00146*<br>[0.000142, 0.00279]        |
| Quartile 3                     | -0.000234<br>[-0.00222, 0.00175]       | 0.00176<br>[-0.000801, 0.00432]        | 0.00301**<br>[0.000938, 0.00508]       |
| Quartile 4                     | 0.00172<br>[-0.000910, 0.00435]        | 0.00533**<br>[0.00213, 0.00852]        | 0.00428**<br>[0.00176, 0.00681]        |
| <b>Nurse-to-patient ratio</b>  | -0.00044<br>[-0.00138, 0.000492]       | -0.0000348<br>[-0.000183, 0.000114]    | 0.0000305**<br>[0.00000904, 0.0000521] |
| <b>CT Scanner</b>              | -0.000686<br>[-0.00248, 0.00110]       | -0.000364<br>[-0.00190, 0.00118]       | 0.00110<br>[-0.0000943, 0.00230]       |
| <b>EBCT†</b>                   | -0.000734<br>[-0.00199, 0.000521]      | 0.000686<br>[-0.000716, 0.00209]       | 0.000345<br>[-0.000832, 0.00152]       |
| <b>MRI†</b>                    | 0.000423<br>[-0.00112, 0.00197]        | -0.000626<br>[-0.00190, 0.000648]      | -0.000293<br>[-0.00136, 0.000779]      |
| <b>MSCT†</b>                   | 0.0000238<br>[-0.000815, 0.000863]     | 0.000869*<br>[0.00000117, 0.00174]     | -0.000444<br>[-0.00111, 0.000226]      |
| <b>PET†</b>                    | 0.00105*<br>[0.0000635, 0.00204]       | -0.000620<br>[-0.00171, 0.000466]      | -0.000471<br>[-0.00133, 0.000389]      |

Year and hospital fixed effects also included in regression

95% CI in brackets; \*\*\* p<0.001, \*\* p<0.01, \* p<0.05; † Bonferroni Correction statistically significant

†Electron beam computed tomography (EBCT), magnetic resonance imaging (MRI), multi-slice spiral computed tomography (MSCT), positron emission tomography (PET)

**sTable 7. Adjusted Effect on Patient Satisfaction**

|                                | Hospital Clean                             | Nurse Communicated Well                        | Doctor Communicated Well                   | Patient Received Help as Soon as Wanted      | Pain Well Controlled                          | Staff Explained Medicines                      | Hospital Quiet at Night                     | Staff Provided Home Care Instructions (Y/N) | Probably/ Definitely Recommend Hospital (Y/N)  | Hospital Rating 7-10                           |
|--------------------------------|--------------------------------------------|------------------------------------------------|--------------------------------------------|----------------------------------------------|-----------------------------------------------|------------------------------------------------|---------------------------------------------|---------------------------------------------|------------------------------------------------|------------------------------------------------|
| <b>Market Concentration</b>    |                                            |                                                |                                            |                                              |                                               |                                                |                                             |                                             |                                                |                                                |
| HHI                            | -3.91E-06*<br>[-0.0000069,<br>-0.00000922] | -2.81E-06***†<br>[-0.00000454,<br>-0.00000109] | -1.77E-06*<br>[-0.0000033,<br>-0.00000232] | -8.01E-06***†<br>[-0.000011,<br>-0.00000499] | -4.49E-06***†<br>[-0.00000657,<br>-0.0000024] | -6.27E-06***†<br>[-0.00000998,<br>-0.00000257] | -3.53E-06*<br>[-0.00000682,<br>-0.00000238] | -3.48E-06*<br>[-0.00000659,<br>-0.00000372] | -4.02E-06***†<br>[-0.00000594,<br>-0.00000209] | -4.57E-06***†<br>[-0.00000748,<br>-0.00000167] |
| <b>Integration level</b>       |                                            |                                                |                                            |                                              |                                               |                                                |                                             |                                             |                                                |                                                |
| Independent                    | 0.00105                                    | 0.000296                                       | -0.000139                                  | 0.00100                                      | 0.00142                                       | 0.00436                                        | 0.00174                                     | 0.00139                                     | 0.000640                                       | 0.000451                                       |
| Physician Assoc.               | [-0.00209,<br>0.00419]                     | [-0.00161,<br>0.00221]                         | [-0.00188,<br>0.00160]                     | [-0.00257,<br>0.00457]                       | [-0.00121,<br>0.00404]                        | [-0.000186,<br>0.00890]                        | [-0.00186,<br>0.00535]                      | [-0.00290,<br>0.00568]                      | [-0.00169,<br>0.00297]                         | [-0.00300,<br>0.00390]                         |
| Open Physician Hospital Org.   | -0.000812<br>[-0.00377,<br>0.00214]        | -0.000495<br>[-0.00209,<br>0.00110]            | -0.000710<br>[-0.00222,<br>0.000797]       | -0.00219<br>[-0.00499,<br>0.000606]          | -0.000726<br>[-0.00267,<br>0.00122]           | -0.000239<br>[-0.00348,<br>0.00300]            | -0.000202<br>[-0.00350,<br>0.00309]         | -0.00288<br>[-0.00601,<br>0.000254]         | -0.000401<br>[-0.00234,<br>0.00154]            | -0.00128<br>[-0.00405,<br>0.00148]             |
| Closed Physician Hospital Org. | 0.00132<br>[-0.00110,<br>0.00374]          | -0.00130<br>[-0.00289,<br>0.000281]            | -0.00112<br>[-0.00261,<br>0.000371]        | -0.00175<br>[-0.00437,<br>0.000871]          | -0.000401<br>[-0.00232,<br>0.00152]           | -0.000273<br>[-0.00352,<br>0.00297]            | -0.000769<br>[-0.00370,<br>0.00216]         | -0.00378*<br>[-0.00704,<br>-0.000527]       | -0.000922<br>[-0.00274,<br>0.000892]           | -0.00351*<br>[-0.00617,<br>-0.000851]          |
| Fully Integrated Org.          | -0.000303<br>[-0.00195,<br>0.00134]        | -0.000335<br>[-0.00100,<br>0.000935]           | -0.000877<br>[-0.000976,<br>0.000800]      | -0.000388<br>[-0.00206,<br>0.00128]          | -0.000397<br>[-0.00161,<br>0.000815]          | 0.000639<br>[-0.00147,<br>0.00275]             | 0.000193<br>[-0.00163,<br>0.00202]          | -0.000277<br>[-0.00216,<br>0.00160]         | -0.000879<br>[-0.00124,<br>0.00106]            | -0.00110<br>[-0.00277,<br>0.000564]            |
| <b>Admissions</b>              |                                            |                                                |                                            |                                              |                                               |                                                |                                             |                                             |                                                |                                                |
| Quartile 2                     | -0.000987<br>[-0.00436,<br>0.00239]        | -0.000858<br>[-0.00278,<br>0.00107]            | 0.0000304<br>[-0.00183,<br>0.00189]        | 0.000541<br>[-0.00298,<br>0.00406]           | -0.000534<br>[-0.00290,<br>0.00183]           | -0.000685<br>[-0.00506,<br>0.00369]            | -0.00340*<br>[-0.00674,<br>-0.0000578]      | -0.00108<br>[-0.00482,<br>.00266]           | 0.00104<br>[-0.00130,<br>0.00339]              | 0.001<br>[-0.00222,<br>0.00422]                |
| Quartile 3                     | -0.000678<br>[-0.00509,<br>0.00374]        | 0.000790<br>[-0.00163,<br>0.00321]             | 0.000224<br>[-0.00205,<br>0.00250]         | 0.00207<br>[-0.00228,<br>0.00642]            | 0.000131<br>[-0.00290,<br>0.00317]            | 0.00029<br>[-0.00522,<br>0.00580]              | -0.00247<br>[-0.00692,<br>0.00199]          | -0.00194<br>[-0.00670,<br>0.00282]          | 0.00310*<br>[0.000202,<br>0.00601]             | 0.00345<br>[-0.000633,<br>0.00754]             |
| Quartile 4                     | -0.00155<br>[-0.00666,<br>0.00356]         | 0.00134<br>[-0.00147,<br>0.00414]              | 0.000292<br>[-0.00225,<br>0.00283]         | 0.00406<br>[-0.00102,<br>0.00913]            | -0.0000116<br>[-0.00343,<br>0.00341]          | 0.00184<br>[-0.00461,<br>0.00829]              | -0.00295<br>[-0.00823,<br>0.00233]          | -0.00278<br>[-0.00836,<br>0.00280]          | 0.00537**<br>[0.00200,<br>0.00875]             | 0.00566*<br>[0.000843,<br>0.0105]              |
| <b>Nurse-to-patient ratio</b>  | 0.000481<br>[-0.000203,<br>0.00116]        | 0.000458<br>[-0.0000175,<br>0.000935]          | -0.000423<br>[-0.000875,<br>0.0000294]     | 0.000791<br>[-0.000372,<br>0.00195]          | -0.0000718<br>[-0.000449,<br>0.000305]        | 0.000309<br>[-0.00118,<br>0.00180]             | 0.00128**<br>[0.000333,<br>0.00223]         | 0.000744<br>[-0.000634,<br>0.00212]         | 0.000119<br>[-0.000311,<br>0.000550]           | 0.000167<br>[-0.000540,<br>0.000873]           |
| <b>CT Scanner</b>              | 0.000377<br>[-0.00276,<br>0.00351]         | 0.00122<br>[-0.000544,<br>0.00298]             | 0.00158<br>[-0.000155,<br>0.00332]         | 0.00240<br>[-0.000772,<br>0.00558]           | 0.00104<br>[-0.00138,<br>0.00346]             | 0.000216<br>[-0.00408,<br>0.00452]             | -0.000749<br>[-0.00386,<br>0.00236]         | -0.00089<br>[-0.00447,<br>0.00269]          | 0.00132<br>[-0.000833,<br>0.00347]             | 0.000192<br>[-0.00282,<br>0.00321]             |
| <b>EBCT†</b>                   | 0.000794                                   | -0.000145                                      | 0.000270                                   | -0.000559                                    | 0.000466                                      | -0.000482                                      | -0.000615                                   | 0.00162                                     | -0.000364                                      | -0.000611                                      |

|              |                        |                          |                          |                         |                         |                         |                         |                         |                          |                         |
|--------------|------------------------|--------------------------|--------------------------|-------------------------|-------------------------|-------------------------|-------------------------|-------------------------|--------------------------|-------------------------|
|              | [-0.00118,<br>0.00276] | [-0.00138,<br>0.00109]   | [-0.000790,<br>0.00133]  | [-0.00263,<br>0.00151]  | [-0.000920,<br>0.00185] | [-0.00301,<br>0.00205]  | [-0.00297,<br>0.00174]  | [-0.000517,<br>0.00377] | [-0.0018,<br>0.00107]    | [-0.00270,<br>0.00148]  |
| <b>MRI†</b>  | -0.000644              | -0.00133                 | -0.00102                 | -0.00258                | -0.00118                | -0.00278                | -0.00102                | -0.0015                 | -0.00128                 | -0.000942               |
|              | [-0.00302,<br>0.00173] | [-0.00268,<br>0.0000237] | [-0.00242,<br>0.000382]  | [-0.00530,<br>0.000141] | [-0.00311,<br>0.000739] | [-0.00613,<br>0.000560] | [-0.00353,<br>0.00150]  | [-0.00420,<br>0.00120]  | [-0.00298,<br>0.000412]  | [-0.00331,<br>0.00142]  |
| <b>MSCT†</b> | 0.000191               | 0.000375                 | -0.000243                | 0.000482                | -0.000632               | 0.000942                | -0.00106                | 0.000448                | 0.00026                  | 0.000382                |
|              | [-0.00133,<br>0.00171] | [-0.000477,<br>0.00123]  | [-0.00104,<br>0.000560]  | [-0.00105,<br>0.00201]  | [-0.00172,<br>0.000453] | [-0.000986,<br>0.00287] | [-0.00274,<br>0.000622] | [-0.00126,<br>0.00215]  | [-0.000796,<br>0.00132]  | [-0.00113,<br>0.00189]  |
| <b>PET†</b>  | -0.000333              | -0.000905*               | -0.00101*                | -0.00133                | -0.00031                | -0.00104                | -0.000641               | 0.000228                | -0.001                   | -0.00103                |
|              | [-0.00188,<br>0.00122] | [-0.00177,<br>-0.000042] | [-0.00181,<br>-0.000211] | [-0.00288,<br>0.000226] | [-0.00140,<br>0.000779] | [-0.00293,<br>0.000843] | [-0.00243,<br>0.00114]  | [-0.00152,<br>0.00198]  | [-0.00206,<br>0.0000545] | [-0.00252,<br>0.000457] |

Year and hospital fixed effects also included in regression

95% CI in brackets; \*\*\* p<0.001, \*\* p<0.01, \* p<0.05; † Bonferroni Correction statistically significant

†Electron beam computed tomography (EBCT), magnetic resonance imaging (MRI), multi-slice spiral computed tomography (MSCT), positron emission tomography (PET)
